# Supplementary material for: Human esophageal myofibroblast secretion of bone morphogenetic proteins and GREMLIN1 and paracrine regulation of squamous epithelial growth
Source: PubMed Central journal article supplement (PMC6098060; doi:10.1038/s41598-018-30799-7), 2018-08-17

# Human esophageal myofibroblast secretion of bone morphogenetic proteins and GREMLIN1 and paracrine regulation of squamous epithelial growth

Chunying Zhang<sup>1</sup>, Chao Niu<sup>1</sup>, Kevin Yang<sup>1</sup>, Anisa Shaker<sup>1\*</sup>

<sup>1</sup>Department of Internal Medicine, Division of Gastrointestinal and Liver Diseases, Keck School of Medicine of USC, Los Angeles, CA, USA

\* Corresponding author

E-mail: [ashaker@usc.edu](mailto:ashaker@usc.edu)

## Supporting information

**Supplementary Figure 1. Epithelial cell proliferation in squamous epithelium in 3D organotypic ALI culture with HEMF conditioned media.** Ki-67 immunostaining was performed on paraffin-embedded, formalin-fixed sections of 3D organotypic ALI cultures established with serum-free myofibroblast media (SFMM), conditioned SFMM, and cSFMM with GREM1 nAb. Sparse Ki-67 immunostaining, limited to the basal cell layer, is seen under all conditions, precluding reliable quantification.

**Supplementary Figure 2. H&E of squamous epithelium in 3D organotypic ALI culture with HEMF conditioned media with and without BMP4 nAb.** H&E immunostaining of squamous epithelium harvested from 3D organotypic ALI culture shows the squamous epithelium in the presence of serum-free myofibroblast media (SFMM), conditioned serum-free myofibroblast media (cSFMM), or cSFMM plus the addition of BMP4 nAb. Epithelial squamous morphology and thickness are unchanged with the addition of BMP4 nAb to conditioned HEMF media.

**Supplementary Figure 1. Basal cell proliferation in squamous epithelium in 3D organotypic ALI culture with HEMF conditioned media with and without GREM1 nAb. Sparse Ki-67 immunostaining is seen under all conditions,**

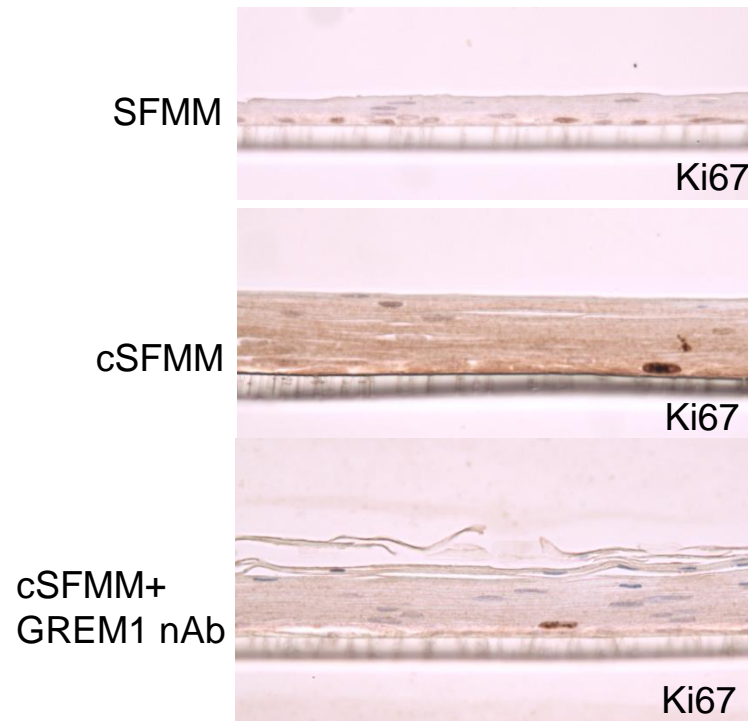

**Supplementary Figure 2. H&E of squamous epithelium in 3D organotypic ALI culture with HEMF conditioned media with and without BMP4 nAb.** Epithelial squamous morphology and thickness are unchanged with the addition of BMP4 nAb to conditioned HEMF media in 3D organotypic ALI culture.

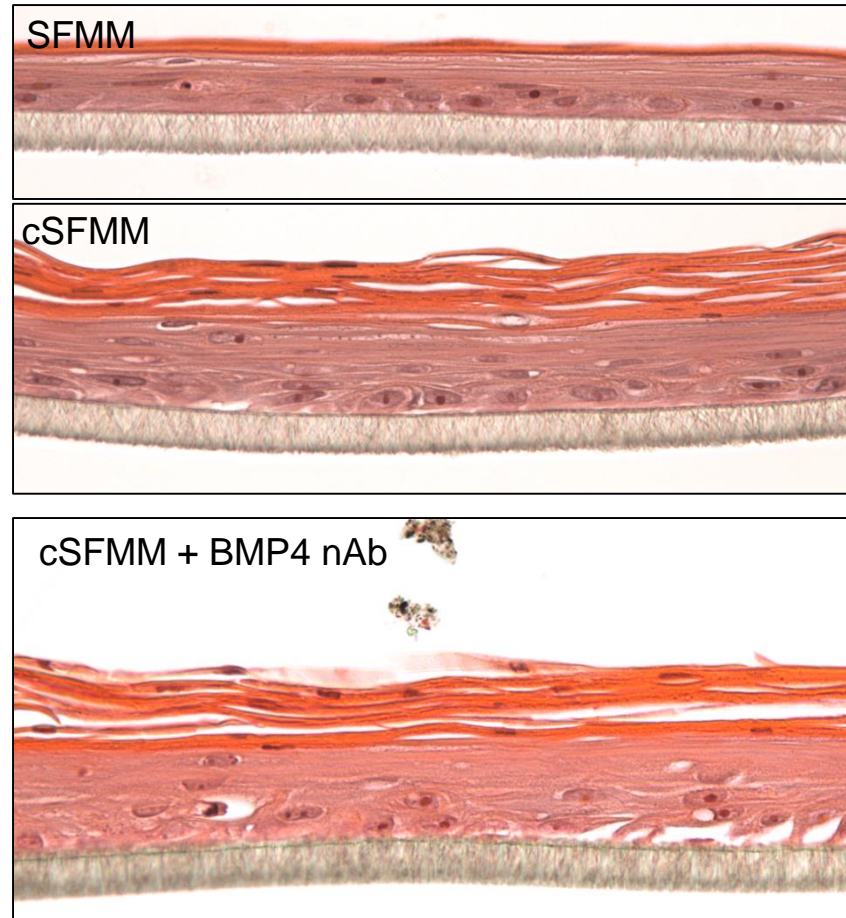

Supplement: 41598_2018_30799_MOESM1_ESM.pdf [file 41598_2018_30799_MOESM1_ESM.pdf]
